# Supplementary material for: Characterizing genetic and antigenic divergence from vaccine strain of influenza A and B viruses circulating in Thailand, 2017–2020
Source: PubMed Central journal article supplement (PMC7803983; doi:10.1038/s41598-020-80895-w), 2021-01-12
Supplement: 41598_2020_80895_MOESM1_ESM.pdf [file 41598_2020_80895_MOESM1_ESM.pdf]

# Characterizing genetic and antigenic divergence from vaccine strain of influenza A and B viruses circulating in Thailand, 2017-2020

Nungruthai Suntronwong, Sirapa Klinfueng, Sumeth Korkong, Preeyaporn Vichaiwattana, Thanunrat Thongmee, Sompong Vongpunsawad, Yong Poovorawan\*

**Supplementary Table 1.** Accession numbers of HA sequences of circulating influenza A(H1N1)pdm09, A(H3N2) and B virus strains in this study.

## Influenza A(H1N1)pdm09

| Accession No. | Sequence ID               | Accession No. | Sequence ID               |
|---------------|---------------------------|---------------|---------------------------|
| MT803149      | A/Thailand/CU-B28541/2018 | MT803194      | A/Thailand/CU-B33041/2019 |
| MT803150      | A/Thailand/CU-B28297/2018 | MT803195      | A/Thailand/CU-B33058/2019 |
| MT803151      | A/Thailand/CU-B25494/2017 | MT803196      | A/Thailand/CU-B32333/2019 |
| MT803152      | A/Thailand/CU-B24689/2017 | MT803197      | A/Thailand/CU-B33247/2019 |
| MT803153      | A/Thailand/CU-B23453/2017 | MT803198      | A/Thailand/CU-B32110/2019 |
| MT803154      | A/Thailand/CU-B23241/2017 | MT803199      | A/Thailand/CU-B31995/2019 |
| MT803155      | A/Thailand/CU-B22888/2017 | MT803200      | A/Thailand/CU-B31366/2019 |
| MT803156      | A/Thailand/CU-B25506/2017 | MT803201      | A/Thailand/CU-B27932/2018 |
| MT803157      | A/Thailand/CU-B31088/2019 | MT803202      | A/Thailand/CU-B28803/2018 |
| MT803158      | A/Thailand/CU-B28420/2018 | MT803203      | A/Thailand/CU-B26903/2018 |
| MT803159      | A/Thailand/CU-E1099/2018  | MT803204      | A/Thailand/CU-B27534/2018 |
| MT803160      | A/Thailand/CU-B36824/2020 | MT803205      | A/Thailand/CU-B29642/2018 |
| MT803161      | A/Thailand/CU-B37035/2020 | MT803206      | A/Thailand/CU-H3896/2018  |
| MT803162      | A/Thailand/CU-B36559/2020 | MT803207      | A/Thailand/CU-B29280/2018 |
| MT803163      | A/Thailand/CU-B36313/2020 | MT803208      | A/Thailand/CU-B28162/2018 |
| MT803164      | A/Thailand/CU-B36543/2020 | MT803209      | A/Thailand/CU-B25276/2017 |
| MT803165      | A/Thailand/CU-B37406/2020 | MT803210      | A/Thailand/CU-B26079/2017 |
| MT803166      | A/Thailand/CU-B33254/2019 | MT803211      | A/Thailand/CU-B26815/2018 |
| MT803167      | A/Thailand/CU-B36101/2020 | MT803212      | A/Thailand/CU-B26827/2018 |
| MT803168      | A/Thailand/CU-B33657/2019 | MT803213      | A/Thailand/CU-B27179/2018 |
| MT803169      | A/Thailand/CU-B33961/2019 | MT803214      | A/Thailand/CU-B29765/2018 |
| MT803170      | A/Thailand/CU-B32495/2019 | MT803215      | A/Thailand/CU-B29061/2018 |

| Accession No. | Sequence ID               | Accession No. | Sequence ID               |
|---------------|---------------------------|---------------|---------------------------|
| MT803171      | A/Thailand/CU-B33264/2019 | MT803216      | A/Thailand/CU-E995/2018   |
| MT803172      | A/Thailand/CU-B35405/2019 | MT803217      | A/Thailand/CU-B29290/2018 |
| MT803173      | A/Thailand/CU-B34831/2019 | MT803218      | A/Thailand/CU-B27420/2018 |
| MT803174      | A/Thailand/CU-B34351/2019 | MT803219      | A/Thailand/CU-A3166/2018  |
| MT803175      | A/Thailand/CU-B35002/2019 | MT803220      | A/Thailand/CU-B25124/2017 |
| MT803176      | A/Thailand/CU-B34081/2019 | MT803221      | A/Thailand/CU-B30149/2018 |
| MT803177      | A/Thailand/CU-B34082/2019 | MT803222      | A/Thailand/CU-B30542/2018 |
| MT803178      | A/Thailand/CU-B35519/2019 | MT803223      | A/Thailand/CU-B30621/2018 |
| MT803179      | A/Thailand/CU-B36840/2020 | MT803224      | A/Thailand/CU-B30112/2018 |
| MT803180      | A/Thailand/CU-B35253/2019 | MT803225      | A/Thailand/CU-B27943/2018 |
| MT803181      | A/Thailand/CU-B33609/2019 | MT803226      | A/Thailand/CU-B27082/2018 |
| MT803182      | A/Thailand/CU-B33269/2019 | MT803227      | A/Thailand/CU-B27898/2018 |
| MT803183      | A/Thailand/CU-B35326/2019 | MT803228      | A/Thailand/CU-B24386/2017 |
| MT803184      | A/Thailand/CU-B34836/2019 | MT803229      | A/Thailand/CU-H3898/2018  |
| MT803185      | A/Thailand/CU-B35599/2019 | MT803230      | A/Thailand/CU-B28019/2018 |
| MT803186      | A/Thailand/CU-B33692/2019 | MT803231      | A/Thailand/CU-B27073/2018 |
| MT803187      | A/Thailand/CU-B33972/2019 | MT803232      | A/Thailand/CU-B22514/2017 |
| MT803188      | A/Thailand/CU-B33649/2019 | MT803233      | A/Thailand/CU-B23198/2017 |
| MT803189      | A/Thailand/CU-B33583/2019 | MT803234      | A/Thailand/CU-B25092/2017 |
| MT803190      | A/Thailand/CU-B33616/2019 | MT803235      | A/Thailand/CU-B22532/2017 |
| MT803191      | A/Thailand/CU-B32938/2019 | MT803236      | A/Thailand/CU-B27410/2018 |
| MT803192      | A/Thailand/CU-B33699/2019 | MT803237      | A/Thailand/CU-B27490/2018 |
| MT803193      | A/Thailand/CU-B31081/2019 | MT803238      | A/Thailand/CU-B24083/2017 |

### Influenza A(H3N2) virus

| Accession No. | Sequence ID               | Accession No. | Sequence ID               |
|---------------|---------------------------|---------------|---------------------------|
| MT803239      | A/Thailand/CU-B36536/2020 | MT803284      | A/Thailand/CU-B24398/2017 |
| MT803240      | A/Thailand/CU-B36023/2020 | MT803285      | A/Thailand/CU-B27414/2018 |
| MT803241      | A/Thailand/CU-B36542/2020 | MT803286      | A/Thailand/CU-B25961/2017 |
| MT803242      | A/Thailand/CU-B35602/2019 | MT803287      | A/Thailand/CU-B31991/2019 |
| MT803243      | A/Thailand/CU-CN846/2019  | MT803288      | A/Thailand/CU-B25464/2017 |
| MT803244      | A/Thailand/CU-E1482/2019  | MT803289      | A/Thailand/CU-B33398/2019 |
| MT803245      | A/Thailand/CU-E1426/2019  | MT803290      | A/Thailand/CU-B33996/2019 |
| MT803246      | A/Thailand/CU-E1421/2019  | MT803291      | A/Thailand/CU-B34006/2019 |
| MT803247      | A/Thailand/CU-E1422/2019  | MT803292      | A/Thailand/CU-B31893/2019 |
| MT803248      | A/Thailand/CU-B36095/2020 | MT803293      | A/Thailand/CU-B26867/2017 |
| MT803249      | A/Thailand/CU-B32225/2019 | MT803294      | A/Thailand/CU-B26053/2017 |
| MT803250      | A/Thailand/CU-B36392/2020 | MT803295      | A/Thailand/CU-B26815/2018 |
| MT803251      | A/Thailand/CU-B37010/2020 | MT803296      | A/Thailand/CU-B27086/2018 |
| MT803252      | A/Thailand/CU-B36805/2020 | MT803297      | A/Thailand/CU-B27083/2018 |

| Accession No. | Sequence ID               | Accession No. | Sequence ID               |
|---------------|---------------------------|---------------|---------------------------|
| MT803253      | A/Thailand/CU-B37058/2020 | MT803298      | A/Thailand/CU-B23250/2017 |
| MT803254      | A/Thailand/CU-B34078/2019 | MT803299      | A/Thailand/CU-B23240/2017 |
| MT803255      | A/Thailand/CU-B33013/2019 | MT803300      | A/Thailand/CU-B25287/2017 |
| MT803256      | A/Thailand/CU-B31078/2018 | MT803301      | A/Thailand/CU-B26075/2017 |
| MT803257      | A/Thailand/CU-B34085/2019 | MT803302      | A/Thailand/CU-B25502/2017 |
| MT803258      | A/Thailand/CU-B34928/2019 | MT803303      | A/Thailand/CU-B23448/2017 |
| MT803259      | A/Thailand/CU-B34789/2019 | MT803304      | A/Thailand/CU-B23053/2017 |
| MT803260      | A/Thailand/CU-B36553/2020 | MT803305      | A/Thailand/CU-B26734/2017 |
| MT803261      | A/Thailand/CU-B31931/2019 | MT803306      | A/Thailand/CU-B27093/2018 |
| MT803262      | A/Thailand/CU-B30914/2018 | MT803307      | A/Thailand/CU-B31119/2018 |
| MT803263      | A/Thailand/CU-B31216/2019 | MT803308      | A/Thailand/CU-B31714/2019 |
| MT803264      | A/Thailand/CU-B35270/2019 | MT803309      | A/Thailand/CU-B32345/2019 |
| MT803265      | A/Thailand/CU-B35397/2019 | MT803310      | A/Thailand/CU-B31593/2019 |
| MT803266      | A/Thailand/CU-B34340/2019 | MT803311      | A/Thailand/CU-B29296/2018 |
| MT803267      | A/Thailand/CU-B32786/2019 | MT803312      | A/Thailand/CU-B30632/2018 |
| MT803268      | A/Thailand/CU-B33665/2019 | MT803313      | A/Thailand/CU-B28861/2018 |
| MT803269      | A/Thailand/CU-H3957/2019  | MT803314      | A/Thailand/CU-E1501/2019  |
| MT803270      | A/Thailand/CU-B33676/2019 | MT803315      | A/Thailand/CU-H3900/2018  |
| MT803271      | A/Thailand/CU-B33912/2019 | MT803316      | A/Thailand/CU-B30672/2018 |
| MT803272      | A/Thailand/CU-B33421/2019 | MT803317      | A/Thailand/CU-H3914/2019  |
| MT803273      | A/Thailand/CU-B33444/2019 | MT803318      | A/Thailand/CU-B28696/2018 |
| MT803274      | A/Thailand/CU-B33261/2019 | MT803319      | A/Thailand/CU-B28847/2018 |
| MT803275      | A/Thailand/CU-B33143/2019 | MT803320      | A/Thailand/CU-B27591/2018 |
| MT803276      | A/Thailand/CU-B33021/2019 | MT803321      | A/Thailand/CU-B30421/2018 |
| MT803277      | A/Thailand/CU-B33700/2019 | MT803322      | A/Thailand/CU-B27503/2018 |
| MT803278      | A/Thailand/CU-B33224/2019 | MT803323      | A/Thailand/CU-B28536/2018 |
| MT803279      | A/Thailand/CU-B34698/2019 | MT803324      | A/Thailand/CU-B24679/2017 |
| MT803280      | A/Thailand/CU-B25698/2017 | MT803325      | A/Thailand/CU-B22867/2017 |
| MT803281      | A/Thailand/CU-B36847/2020 | MT803326      | A/Thailand/CU-B22539/2017 |
| MT803282      | A/Thailand/CU-B24415/2017 | MT803327      | A/Thailand/CU-B22742/2017 |
| MT803283      | A/Thailand/CU-B23866/2017 | MT803328      | A/Thailand/CU-B22413/2017 |

### Influenza B virus

| Accession No. | Sequence ID               | Accession No. | Sequence ID               |
|---------------|---------------------------|---------------|---------------------------|
| MT803397      | B/Thailand/CU-H3906/2018  | MT803438      | B/Thailand/CU-B31196/2019 |
| MT803398      | B/Thailand/CU-B30897/2018 | MT803439      | B/Thailand/CU-B33467/2019 |
| MT803399      | B/Thailand/CU-B29948/2018 | MT803440      | B/Thailand/CU-B34528/2019 |
| Accession No. | Sequence ID               | Accession No. | Sequence ID               |
| MT803400      | B/Thailand/CU-B31984/2019 | MT803441      | B/Thailand/CU-B35712/2019 |

|          |                           |          |                           |
|----------|---------------------------|----------|---------------------------|
| MT803401 | B/Thailand/CU-B36630/2020 | MT803442 | B/Thailand/CU-B23834/2017 |
| MT803402 | B/Thailand/CU-B36616/2020 | MT803443 | B/Thailand/CU-B22512/2017 |
| MT803403 | B/Thailand/CU-B35426/2019 | MT803444 | B/Thailand/CU-B22891/2017 |
| MT803404 | B/Thailand/CU-B35796/2019 | MT803445 | B/Thailand/CU-B25303/2017 |
| MT803405 | B/Thailand/CU-B34172/2019 | MT803446 | B/Thailand/CU-B26338/2017 |
| MT803406 | B/Thailand/CU-B34270/2019 | MT803447 | B/Thailand/CU-B24631/2017 |
| MT803407 | B/Thailand/CU-E1993/2019  | MT803448 | B/Thailand/CU-B22889/2017 |
| MT803408 | B/Thailand/CU-WC06/2020   | MT803449 | B/Thailand/CU-B24918/2017 |
| MT803409 | B/Thailand/CU-B35320/2019 | MT803450 | B/Thailand/CU-B26097/2017 |
| MT803410 | B/Thailand/CU-B34269/2019 | MT803451 | B/Thailand/CU-B27905/2018 |
| MT803411 | B/Thailand/CU-B32496/2019 | MT803452 | B/Thailand/CU-B27783/2018 |
| MT803412 | B/Thailand/CU-B33492/2019 | MT803453 | B/Thailand/CU-B27406/2018 |
| MT803413 | B/Thailand/CU-E1825/2019  | MT803454 | B/Thailand/CU-B27774/2018 |
| MT803414 | B/Thailand/CU-B33997/2019 | MT803455 | B/Thailand/CU-B27416/2018 |
| MT803415 | B/Thailand/CU-B34094/2019 | MT803456 | B/Thailand/CU-B30062/2018 |
| MT803416 | B/Thailand/CU-B31974/2019 | MT803457 | B/Thailand/CU-B27293/2018 |
| MT803417 | B/Thailand/CU-B33686/2019 | MT803458 | B/Thailand/CU-B30789/2018 |
| MT803418 | B/Thailand/CU-B33757/2019 | MT803459 | B/Thailand/CU-E1271/2018  |
| MT803419 | B/Thailand/CU-B36464/2020 | MT803460 | B/Thailand/CU-B28017/2018 |
| MT803420 | B/Thailand/CU-B34980/2019 | MT803461 | B/Thailand/CU-B30027/2018 |
| MT803421 | B/Thailand/CU-B36369/2020 | MT803462 | B/Thailand/CU-B26467/2017 |
| MT803422 | B/Thailand/CU-B36643/2020 | MT803463 | B/Thailand/CU-B24367/2017 |
| MT803423 | B/Thailand/CU-B34381/2019 | MT803464 | B/Thailand/CU-B27287/2018 |
| MT803424 | B/Thailand/CU-E1983/2019  | MT803465 | B/Thailand/CU-B27301/2018 |
| MT803425 | B/Thailand/CU-B33344/2019 | MT803466 | B/Thailand/CU-B26732/2017 |
| MT803426 | B/Thailand/CU-H3948/2019  | MT803467 | B/Thailand/CU-B25966/2017 |
| MT803427 | B/Thailand/CU-B33517/2019 | MT803468 | B/Thailand/CU-B26096/2017 |
| MT803428 | B/Thailand/CU-B32499/2019 | MT803469 | B/Thailand/CU-B25697/2017 |
| MT803429 | B/Thailand/CU-B35644/2019 | MT803470 | B/Thailand/CU-B24933/2017 |
| MT803430 | B/Thailand/CU-B32772/2019 | MT803471 | B/Thailand/CU-B25090/2017 |
| MT803431 | B/Thailand/CU-B34486/2019 | MT803472 | B/Thailand/CU-B26809/2018 |
| MT803432 | B/Thailand/CU-B33518/2019 | MT803473 | B/Thailand/CU-B26647/2017 |
| MT803433 | B/Thailand/CU-B33235/2019 | MT803474 | B/Thailand/CU-B22737/2017 |
| MT803434 | B/Thailand/CU-B32961/2019 | MT803475 | B/Thailand/CU-B25670/2017 |
| MT803435 | B/Thailand/CU-B31194/2019 | MT803476 | B/Thailand/CU-B26746/2017 |
| MT803436 | B/Thailand/CU-H3934/2019  | MT803477 | B/Thailand/CU-B26977/2018 |
| MT803437 | B/Thailand/CU-B31046/2018 |          |                           |

**Supplementary Table 2.** Positive selected sites on the HA coding sequences of influenza A and B viruses identified in Thailand between July 2017 and March 2020.

| Subtype       | Mixed Effects Model of Evolution |            |            |          | Fixed effects likelihood |            |          |                      |
|---------------|----------------------------------|------------|------------|----------|--------------------------|------------|----------|----------------------|
|               | dN/dS <sup>a</sup>               | HA regions | position   | $\beta+$ | P-value <sup>b</sup>     | position   | omega    | P-value <sup>b</sup> |
| A/H1N1(pdm09) | 0.194                            | HA1        | <b>120</b> | 3.77     | 0.05                     | <b>120</b> | Infinity | 0.033                |
|               |                                  |            | 233        | 1.76     | 0.09                     | 233        | Infinity | 0.069                |
|               |                                  | HA2        | 213        | 3963.97  | <0.001                   |            |          |                      |
| A/H3N2        | 0.228                            | HA1        | 57         | 12.75    | 0.06                     | 57         | Infinity | 0.049                |
|               |                                  |            | <b>131</b> | 1574.54  | <0.001                   | <b>135</b> | Infinity | 0.034                |
|               |                                  |            | <b>135</b> | 7.49     | 0.05                     | <b>193</b> | Infinity | 0.058                |
|               |                                  |            | <b>144</b> | 53.68    | 0.07                     |            |          |                      |
|               |                                  | <b>193</b> | 3.21       | 0.08     |                          |            |          |                      |
|               |                                  | HA2        | 18         | 1.94     | 0.09                     | 18         | Infinity | 0.071                |
|               |                                  | 200        | 3.25       | 0.06     | 200                      | Infinity   | 0.043    |                      |
| 201           | 2.43                             | 0.1        | 201        | Infinity | 0.075                    |            |          |                      |
| B/Victoria    | 0.657                            | HA1        | 76         | 168.8    | 0.03                     | 238        | Infinity | 0.058                |
|               |                                  |            | 80         | 150.56   | 0.05                     |            |          |                      |
|               |                                  |            | 87         | 96.25    | <0.001                   |            |          |                      |
|               |                                  |            | 121        | 255.22   | <0.001                   |            |          |                      |
|               |                                  |            | 126        | 32.72    | 0.04                     |            |          |                      |
|               |                                  |            | 128        | 247.49   | 0.04                     |            |          |                      |
|               |                                  |            | 136        | 37.85    | 0.04                     |            |          |                      |
|               |                                  |            | 154        | 154.28   | 0.03                     |            |          |                      |
|               |                                  |            | 160        | 44.19    | 0.03                     |            |          |                      |
| 238           | 1.8                              | 0.08       |            |          |                          |            |          |                      |
| B/Yamagata    | 0.0525                           | HA1        | 227        | 3659.33  | 0.01                     | N/D        | N/D      | N/D                  |

N/D defined as not detected.

<sup>a</sup> dN/dS is the ratio of non-synonymous/synonymous substitutions.

<sup>b</sup> P-value from the MEME and FEL result for a positive selection level.

$\beta+$  is the non-synonymous substitution rate at a site for the positive/neutral evolution component.

Bold text denotes an amino-acid substitution associated with a clade/subclade transition.

**Supplementary Table 3.** Computed antigenic relatedness among the vaccine strain and number of mutations found on the dominant epitope of circulating influenza A(H1N1)pdm09 in Thailand.

| Year | Vaccine strain     | No. of strains | Dominant epitope   | Number of mutations | Pepitope | Efficacy | E (53%) | E (100%) |
|------|--------------------|----------------|--------------------|---------------------|----------|----------|---------|----------|
| 2017 | A/Michigan/45/2015 | 2              | No                 | 0                   | 0.000    | 0.530    | 53.00   | 100.00   |
|      |                    | 2              | A                  | 1                   | 0.042    | 0.480    | 48.04   | 90.64    |
|      |                    | 4              | B                  | 1                   | 0.045    | 0.476    | 47.59   | 89.79    |
|      |                    | 1              | B                  | 2                   | 0.091    | 0.422    | 42.18   | 79.59    |
|      |                    | 13             | C                  | 1                   | 0.030    | 0.494    | 49.39   | 93.20    |
|      |                    | 3              | C                  | 2                   | 0.061    | 0.458    | 45.79   | 86.39    |
|      |                    | 1              | D                  | 1                   | 0.021    | 0.505    | 50.52   | 95.32    |
|      |                    | 1              | E                  | 1                   | 0.029    | 0.495    | 49.50   | 93.40    |
|      |                    | 2              | E                  | 2                   | 0.059    | 0.460    | 46.00   | 86.79    |
| 2018 | A/Michigan/45/2015 | 3              | No                 | 0                   | 0.000    | 0.530    | 53.00   | 100.00   |
|      |                    | 4              | A                  | 1                   | 0.042    | 0.480    | 48.04   | 90.64    |
|      |                    | 3              | A                  | 2                   | 0.083    | 0.431    | 43.08   | 81.29    |
|      |                    | 12             | B                  | 1                   | 0.045    | 0.476    | 47.59   | 89.79    |
|      |                    | 15             | B                  | 2                   | 0.091    | 0.422    | 42.18   | 79.59    |
|      |                    | 21             | C                  | 1                   | 0.030    | 0.494    | 49.39   | 93.20    |
|      |                    | 4              | C                  | 2                   | 0.061    | 0.458    | 45.79   | 86.39    |
|      |                    | 1              | C                  | 3                   | 0.091    | 0.422    | 42.18   | 79.59    |
|      |                    | 1              | D                  | 2                   | 0.042    | 0.480    | 48.04   | 90.64    |
|      |                    | 1              | E                  | 1                   | 0.029    | 0.495    | 49.50   | 93.40    |
|      |                    | 3              | E                  | 2                   | 0.059    | 0.460    | 46.00   | 86.79    |
|      |                    | 2019           | A/Michigan/45/2015 | 1                   | A        | 3        | 0.125   | 0.381    |
| 1    | B                  |                |                    | 1                   | 0.045    | 0.476    | 47.59   | 89.79    |
| 46   | B                  |                |                    | 2                   | 0.091    | 0.422    | 42.18   | 79.59    |
| 14   | B                  |                |                    | 3                   | 0.136    | 0.368    | 36.77   | 69.38    |
| 14   | B                  |                |                    | 4                   | 0.182    | 0.314    | 31.36   | 59.18    |
| 1    | C                  |                |                    | 1                   | 0.030    | 0.494    | 49.39   | 93.20    |
| 1    | E                  |                |                    | 4                   | 0.118    | 0.390    | 39.00   | 73.58    |
| 2020 | A/Brisbane/02/2018 | 1              | A                  | 2                   | 0.083    | 0.431    | 43.08   | 81.29    |
|      |                    | 5              | B                  | 2                   | 0.091    | 0.422    | 42.18   | 79.59    |
|      |                    | 1              | B                  | 3                   | 0.136    | 0.368    | 36.77   | 69.38    |
|      |                    | 1              | C                  | 3                   | 0.091    | 0.422    | 42.18   | 79.59    |

The positions of amino acid residues in the epitope were based on the Deem MW et al., 2009.

E (53%) was calculated from  $E = -1.19 \times P_{\text{epitope}} + 0.53$  in which efficacy is 53% when the  $P_{\text{epitope}} = 0$ .

$E (100\%) = E (53\%) * 100 / 53$ .

**Supplementary Table 4.** Estimation of computed antigenic relatedness between the vaccine strain and number of mutations found on the dominant epitope of circulating influenza A(H3N2) in Thailand.

| Year | Vaccine strain            | No. of strains | Dominant epitope | Number of mutations | Pepitope | Efficacy | E (47%) | E (100%) |
|------|---------------------------|----------------|------------------|---------------------|----------|----------|---------|----------|
| 2017 | A/Hong Kong/4801/2014     | 5              | A                | 1                   | 0.053    | 0.340    | 34.00   | 72.34    |
|      |                           | 31             | A                | 2                   | 0.105    | 0.210    | 21.00   | 44.68    |
|      |                           | 1              | A                | 3                   | 0.158    | 0.080    | 8.00    | 17.02    |
|      |                           | 1              | A                | 4                   | 0.211    | -0.050   | -5.00   | -10.64   |
|      |                           | 3              | E                | 2                   | 0.091    | 0.245    | 24.55   | 52.22    |
|      |                           | 6              | E                | 3                   | 0.136    | 0.133    | 13.32   | 28.34    |
| 2018 | A/Singapore/INFIMH-16-0   | 33             | A                | 2                   | 0.105    | 0.210    | 21.00   | 44.68    |
|      |                           | 1              | A                | 4                   | 0.211    | -0.050   | -5.00   | -10.64   |
|      |                           | 3              | B                | 2                   | 0.095    | 0.235    | 23.48   | 49.95    |
|      |                           | 1              | B                | 3                   | 0.143    | 0.117    | 11.71   | 24.92    |
|      |                           | 7              | C                | 3                   | 0.111    | 0.196    | 19.56   | 41.61    |
|      |                           | 24             | E                | 2                   | 0.091    | 0.245    | 24.55   | 52.22    |
|      |                           | 9              | E                | 3                   | 0.136    | 0.133    | 13.32   | 28.34    |
|      |                           | 1              | E                | 4                   | 0.182    | 0.021    | 2.09    | 4.45     |
| 2019 | A/Switzerland/8060/2017   | 6              | A                | 3                   | 0.158    | 0.080    | 8.00    | 17.02    |
|      |                           | 2              | A                | 4                   | 0.211    | -0.050   | -5.00   | -10.64   |
|      |                           | 11             | A                | 5                   | 0.263    | -0.180   | -18.00  | -38.30   |
|      |                           | 8              | A                | 6                   | 0.316    | -0.310   | -31.00  | -65.96   |
|      |                           | 20             | B                | 2                   | 0.095    | 0.235    | 23.48   | 49.95    |
|      |                           | 19             | B                | 3                   | 0.143    | 0.117    | 11.71   | 24.92    |
|      |                           | 3              | B                | 4                   | 0.190    | 0.000    | -0.05   | -0.10    |
|      |                           | 1              | B                | 7                   | 0.333    | -0.353   | -35.33  | -75.18   |
|      |                           | 1              | D                | 4                   | 0.098    | 0.229    | 22.90   | 48.73    |
|      |                           | 13             | E                | 3                   | 0.136    | 0.133    | 13.32   | 28.34    |
|      |                           | 8              | E                | 4                   | 0.182    | 0.021    | 2.09    | 4.45     |
|      |                           | 3              | E                | 5                   | 0.227    | -0.091   | -9.14   | -19.44   |
|      |                           | 1              | E                | 6                   | 0.273    | -0.204   | -20.36  | -43.33   |
| 2020 | A/South Australia/34/2019 | 1              | A                | 4                   | 0.211    | -0.050   | -5.00   | -10.64   |
|      |                           | 4              | A                | 5                   | 0.263    | -0.180   | -18.00  | -38.30   |
|      |                           | 1              | B                | 3                   | 0.143    | 0.117    | 11.71   | 24.92    |
|      |                           | 3              | B                | 4                   | 0.190    | 0.000    | -0.05   | -0.10    |
|      |                           | 1              | B                | 6                   | 0.286    | -0.236   | -23.57  | -50.15   |

The position of amino acid residues in the epitope was based on the Gupta V et al., 2006.

E(47%) was calculated from  $E = -2.47 \times P_{\text{epitope}} + 0.47$  in which efficacy is 47% when the  $P_{\text{epitope}} = 0$ .

E (100%) = E (47%) \*100 /47.

**Supplementary Table 5.** Computed antigenic relatedness among the vaccine strain and number of mutations found on the dominant epitope of circulating influenza B virus in Thailand.

| Year                       | Vaccine strain       | No. of strains     | Dominant epitope | Number of mutations | Pepitope | Efficacy | E (68.24%) | E (100%) |        |
|----------------------------|----------------------|--------------------|------------------|---------------------|----------|----------|------------|----------|--------|
| <b>B/Yamagata-lineages</b> |                      |                    |                  |                     |          |          |            |          |        |
| 2017                       | B/Phuket/3073/2013   | 34                 | No               | 0                   | 0.000    | 0.682    | 68.24      | 100.00   |        |
|                            |                      | 1                  | A                | 1                   | 0.045    | 0.643    | 64.31      | 94.24    |        |
|                            |                      | 1                  | B                | 1                   | 0.042    | 0.646    | 64.61      | 94.72    |        |
|                            |                      | 1                  | C                | 1                   | 0.043    | 0.645    | 64.48      | 94.50    |        |
|                            |                      | 2                  | D                | 1                   | 0.025    | 0.661    | 66.08      | 96.83    |        |
| 2018                       | B/Phuket/3073/2013   | 39                 | No               | 0                   | 0.000    | 0.682    | 68.24      | 100.00   |        |
|                            |                      | 1                  | A                | 1                   | 0.045    | 0.643    | 64.31      | 94.24    |        |
|                            |                      | 1                  | B                | 1                   | 0.042    | 0.646    | 64.61      | 94.72    |        |
|                            |                      | 1                  | C                | 1                   | 0.043    | 0.645    | 64.48      | 94.50    |        |
|                            |                      | 3                  | D                | 1                   | 0.025    | 0.661    | 66.08      | 96.83    |        |
| 2019                       | B/Phuket/3073/2013   | 2                  | No               | 0                   | 0.000    | 0.682    | 68.24      | 100.00   |        |
| <b>B/Victoria-lineages</b> |                      |                    |                  |                     |          |          |            |          |        |
| 2018                       | B/Brisbane/60/2008   | 6                  | B                | 1                   | 0.040    | 0.648    | 64.78      | 94.94    |        |
|                            |                      |                    |                  |                     |          |          |            |          |        |
|                            | B/Washington/02/2019 | 1 ( $\Delta 3$ )   | No               | 0                   | 0.000    | 0.682    | 68.24      | 100.00   |        |
|                            |                      | 1 ( $\Delta 3$ )   | B                | 1                   | 0.045    | 0.643    | 64.31      | 94.24    |        |
| 2019                       | B/Brisbane/60/2008   | 6                  | B                | 1                   | 0.040    | 0.648    | 64.78      | 94.94    |        |
|                            |                      |                    |                  |                     |          |          |            |          |        |
|                            |                      | B/Colorado/06/2017 | 1 ( $\Delta 2$ ) | No                  | 0        | 0.000    | 0.682      | 68.24    | 100.00 |
|                            |                      |                    | 3 ( $\Delta 2$ ) | A                   | 1        | 0.045    | 0.643      | 64.31    | 94.24  |
|                            |                      |                    | 1 ( $\Delta 2$ ) | B                   | 1        | 0.043    | 0.645      | 64.48    | 94.50  |
| 1 ( $\Delta 2$ )           | E                    |                    | 1                | 0.040               | 0.648    | 64.78    | 94.94      |          |        |
| B/Washington/02/2019       | 52 ( $\Delta 3$ )    | No                 | 0                | 0.000               | 0.682    | 68.24    | 100.00     |          |        |
|                            | 9 ( $\Delta 3$ )     | A                  | 1                | 0.045               | 0.643    | 64.31    | 94.24      |          |        |
|                            | 1 ( $\Delta 3$ )     | B                  | 1                | 0.045               | 0.643    | 64.31    | 94.24      |          |        |
|                            | 3 ( $\Delta 3$ )     | D                  | 1                | 0.025               | 0.661    | 66.08    | 96.83      |          |        |
| 2020                       | B/Washington/02/2019 | 1 ( $\Delta 3$ )   | No               | 0                   | 0.000    | 0.682    | 68.24      | 100.00   |        |
|                            |                      | 1 ( $\Delta 3$ )   | A                | 1                   | 0.045    | 0.643    | 64.31      | 94.24    |        |
|                            |                      | 1 ( $\Delta 3$ )   | B                | 1                   | 0.045    | 0.643    | 64.31      | 94.24    |        |
|                            |                      | 1 ( $\Delta 3$ )   | D                | 3                   | 0.075    | 0.618    | 61.76      | 90.50    |        |
|                            |                      | 2 ( $\Delta 3$ )   | E                | 1                   | 0.040    | 0.648    | 64.78      | 94.94    |        |

The position of amino acid residues in the epitope was based on the Pan Y et al., 2016.

$\Delta 2$  defined as the circulating strain with 162-163 deletions in HA1 sequence and only compared with B/Colorado/06/2017.

$\Delta 3$  indicated the circulating strain with 162-164 deletions in HA1 sequence and only compared with B/Washington/02/2019.

E (68.24%) was calculated from  $E = -0.864 \times P_{\text{epitope}} + 0.6824$  in which efficacy is 68.24% when the  $P_{\text{epitope}} = 0$ .

$E (100\%) = E (68.24\%) * 100 / 68.24$ .



A)

| Antigenic sites           | A(H1N1)pdm09 |     |     |     |     |     |     |     |     |     |     |     |     |     |     |     |     |    |     |     | HA1 |     |     |     |    |    |    |  |  |  | HA2 |  |  |  |  |  |  |  |  |  |
|---------------------------|--------------|-----|-----|-----|-----|-----|-----|-----|-----|-----|-----|-----|-----|-----|-----|-----|-----|----|-----|-----|-----|-----|-----|-----|----|----|----|--|--|--|-----|--|--|--|--|--|--|--|--|--|
|                           |              |     |     |     |     |     |     |     |     |     |     |     |     |     |     |     |     |    |     |     | RBS | RBS | RBS | RBS |    |    |    |  |  |  |     |  |  |  |  |  |  |  |  |  |
|                           |              |     |     |     |     |     |     |     |     |     |     |     |     |     |     |     |     |    |     |     | Cb  | Sa  | Sa  | Sa  | Sb | Sb | Sb |  |  |  |     |  |  |  |  |  |  |  |  |  |
| Amino acid position       | 74           | 120 | 129 | 130 | 156 | 161 | 164 | 183 | 185 | 187 | 189 | 223 | 235 | 250 | 260 | 271 | 295 | 77 | 124 | 179 | 193 |     |     |     |    |    |    |  |  |  |     |  |  |  |  |  |  |  |  |  |
| A/Michigan/45/2015 (6B.1) | S            | T   | N   | K   | N   | L   | S   | S   | T   | D   | Q   | Q   | D   | V   | N   | P   | I   | I  | N   | E   | A   |     |     |     |    |    |    |  |  |  |     |  |  |  |  |  |  |  |  |  |
| 6B.1                      | .            | .   | .   | .   | .   | .   | .   | .   | .   | .   | .   | Q/R | .   | .   | .   | P/Q | .   | .  | .   | .   | .   |     |     |     |    |    |    |  |  |  |     |  |  |  |  |  |  |  |  |  |
| 6B.1A                     | R            | .   | .   | .   | .   | .   | T   | .   | .   | .   | .   | .   | .   | .   | .   | .   | V   | M  | .   | .   | .   |     |     |     |    |    |    |  |  |  |     |  |  |  |  |  |  |  |  |  |
| 6B.1A1                    | R            | .   | .   | .   | .   | .   | T   | P   | T/I | .   | .   | .   | .   | .   | .   | .   | V   | M  | N/T | .   | .   |     |     |     |    |    |    |  |  |  |     |  |  |  |  |  |  |  |  |  |
| 6B.1A5                    | R            | .   | .   | .   | .   | .   | T   | P   | .   | .   | .   | .   | .   | .   | D   | .   | V   | M  | .   | .   | .   |     |     |     |    |    |    |  |  |  |     |  |  |  |  |  |  |  |  |  |
| 6B.1A5A                   | R            | .   | D   | .   | .   | .   | T   | P   | I   | .   | .   | .   | E   | .   | D   | .   | V   | M  | .   | .   | V   |     |     |     |    |    |    |  |  |  |     |  |  |  |  |  |  |  |  |  |
| 6B.1A5A+N156K             | R            | .   | D   | N   | K   | I   | T   | P   | I   | .   | .   | .   | .   | A   | D   | .   | V   | M  | .   | D   | V   |     |     |     |    |    |    |  |  |  |     |  |  |  |  |  |  |  |  |  |
| 6B.1A5A+D187A+Q189E       | R            | .   | D   | .   | .   | .   | T   | P   | I   | A   | E   | .   | .   | .   | D   | .   | V   | M  | .   | .   | V   |     |     |     |    |    |    |  |  |  |     |  |  |  |  |  |  |  |  |  |
| 6B.1A6                    | R            | A   | .   | .   | .   | .   | T   | P   | .   | .   | .   | .   | .   | .   | .   | .   | V   | M  | .   | .   | .   |     |     |     |    |    |    |  |  |  |     |  |  |  |  |  |  |  |  |  |

B)

| Antigenic sites                    | A(H3N2) |    |    |    |     |     |     |     |     |     |     |     |     |     |     |     |     |     |     |     | HA1 |     |     |     |     |     |     |     |   |   | HA2 |   |   |   |   |   |   |   |   |   |  |  |
|------------------------------------|---------|----|----|----|-----|-----|-----|-----|-----|-----|-----|-----|-----|-----|-----|-----|-----|-----|-----|-----|-----|-----|-----|-----|-----|-----|-----|-----|---|---|-----|---|---|---|---|---|---|---|---|---|--|--|
|                                    |         |    |    |    |     |     |     |     |     |     |     |     |     |     |     |     |     |     |     |     | RBS | RBS | RBS | RBS |     |     |     |     |   |   |     |   |   |   |   |   |   |   |   |   |  |  |
|                                    |         |    |    |    |     |     |     |     |     |     |     |     |     |     |     |     |     |     |     |     | E   | E   | E   | D   | D   | B   | A   | A   | A | A | A   | A | B | D | B | B | D | D | E | C |  |  |
| Amino acid position                | 62      | 91 | 92 | 96 | 121 | 128 | 131 | 135 | 137 | 138 | 142 | 144 | 160 | 171 | 193 | 194 | 212 | 246 | 261 | 311 | 17  | 77  | 149 | 150 | 155 | 160 | 200 | 201 |   |   |     |   |   |   |   |   |   |   |   |   |  |  |
| A/Hong Kong/4801/2014 (3C.2a)      | E       | S  | K  | N  | N   | T   | T   | T   | S   | A   | R   | S   | T   | N   | F   | L   | A   | N   | R   | H   | M   | I   | I   | E   | G   | D   | V   | A   |   |   |     |   |   |   |   |   |   |   |   |   |  |  |
| 3C.2a1                             | .       | .  | .  | K  | .   | .   | .   | .   | .   | G/K | .   | .   | .   | .   | K   | .   | .   | .   | .   | .   | .   | V   | .   | .   | E   | .   | .   | .   |   |   |     |   |   |   |   |   |   |   |   |   |  |  |
| 3C.2a1b                            | G       | .  | R  | .  | .   | .   | .   | .   | .   | G   | .   | .   | .   | K   | .   | .   | .   | .   | Q   | .   | .   | .   | G   | E   | .   | .   | .   |     |   |   |     |   |   |   |   |   |   |   |   |   |  |  |
| 3C.2a1b+T131K                      | G       | .  | R  | .  | .   | .   | K   | .   | .   | G   | .   | .   | .   | K   | .   | .   | .   | .   | Q   | .   | .   | .   | G   | E   | .   | I   | .   |     |   |   |     |   |   |   |   |   |   |   |   |   |  |  |
| 3C.2a1b+T135K                      | G       | .  | R  | .  | .   | .   | K   | .   | .   | G   | .   | .   | .   | K   | .   | .   | .   | .   | Q   | .   | .   | .   | G   | E   | .   | .   | .   |     |   |   |     |   |   |   |   |   |   |   |   |   |  |  |
| 3C.2a1b+T135K-A                    | G       | .  | R  | .  | .   | A   | K   | .   | .   | G   | .   | .   | .   | K   | .   | .   | .   | .   | Q   | .   | .   | .   | G   | E   | .   | .   | .   |     |   |   |     |   |   |   |   |   |   |   |   |   |  |  |
| 3C.2a1b+T135K-B                    | G       | .  | R  | .  | .   | A   | K   | K   | F   | S   | G   | .   | .   | K   | S   | .   | .   | .   | Q   | .   | .   | .   | G   | E   | .   | .   | .   |     |   |   |     |   |   |   |   |   |   |   |   |   |  |  |
| 3C.2a2                             | .       | .  | .  | S  | .   | .   | K   | .   | .   | K   | .   | .   | .   | K   | .   | P   | T   | .   | Q   | .   | .   | .   | .   | .   | .   | .   | .   |     |   |   |     |   |   |   |   |   |   |   |   |   |  |  |
| A/Switzerland/9715293/2013 (3C.3a) | E       | S  | K  | N  | N   | A   | T   | T   | S   | S   | G   | N   | K   | N   | F   | L   | A   | N   | R   | Q   | M   | I   | I   | G   | G   | D   | V   | A   |   |   |     |   |   |   |   |   |   |   |   |   |  |  |
| 3C.3a                              | .       | N  | .  | .  | .   | .   | .   | .   | .   | .   | K   | .   | .   | S   | .   | .   | E   | .   | .   | L   | .   | M   | .   | .   | N   | .   | V   |     |   |   |     |   |   |   |   |   |   |   |   |   |  |  |

C)

| Antigenic sites            | B/Yamagata          |   | HA1 |     |
|----------------------------|---------------------|---|-----|-----|
|                            |                     |   | 172 | 251 |
|                            | Amino acid position |   | L   | M   |
| B/Phuket/3073/2013 (Yam 3) | L                   | M |     |     |
| Yamagata 3                 | Q                   | V |     |     |

D)

| Antigenic sites             | B/Victoria          |   |   |   |   |   |   |   | HA1          |          |     |              |     |     |     |     |     |           |     |
|-----------------------------|---------------------|---|---|---|---|---|---|---|--------------|----------|-----|--------------|-----|-----|-----|-----|-----|-----------|-----|
|                             |                     |   |   |   |   |   |   |   | Adj 120 loop | 120 loop | 133 | Adj 120 loop | 136 | 162 | 163 | 164 | 180 | 190 helix | 197 |
|                             | Amino acid position |   |   |   |   |   |   |   | 117          | 129      | 133 | 136          | 162 | 163 | 164 | 180 | 197 |           |     |
| B/Brisbane/60/2008 (Vic 1A) | I                   | N | G | K | K | N | D | I | D            |          |     |              |     |     |     |     |     |           |     |
| VIC1A                       | V                   | D | . | . | . | . | . | . | N            |          |     |              |     |     |     |     |     |           | N   |
| vic1A del2                  | V                   | D | . | . | . | . | . | V | N            |          |     |              |     |     |     |     |     |           | N   |
| Vic1A del3-A                | V                   | D | . | . | . | . | . | T | N            |          |     |              |     |     |     |     |     |           | N   |
| Vic1A del3-B                | V                   | D | R | E | . | . | . | . | N            |          |     |              |     |     |     |     |     |           | N   |

**Supplementary Figure 1.** Sequences Alignment of individual clade/subclade was found in Thai strains. Residue changes between vaccine strains (shown in bold) and the subclade of Thai circulating strains were observed in A) A(H1N1)pdm09 by compared with A/Michigan/45/2015 (accession no. EPI662594; passage history: MDCK1), B) A(H3N2) by compared with A/Hong Kong/4801/2014 (accession no. EPI539576; passage history: SIAT1), C) B/Yamagata-like lineage by compared with B/Phuket/3073/2013 (accession no. EPI529345; passage history: MDCK1) and D) B/Victoria-like lineage by compared with B/Brisbane/60/2008 (accession no. EPI366461; passage history: eggs). Adj defined as AA position located adjacent antigenic site.

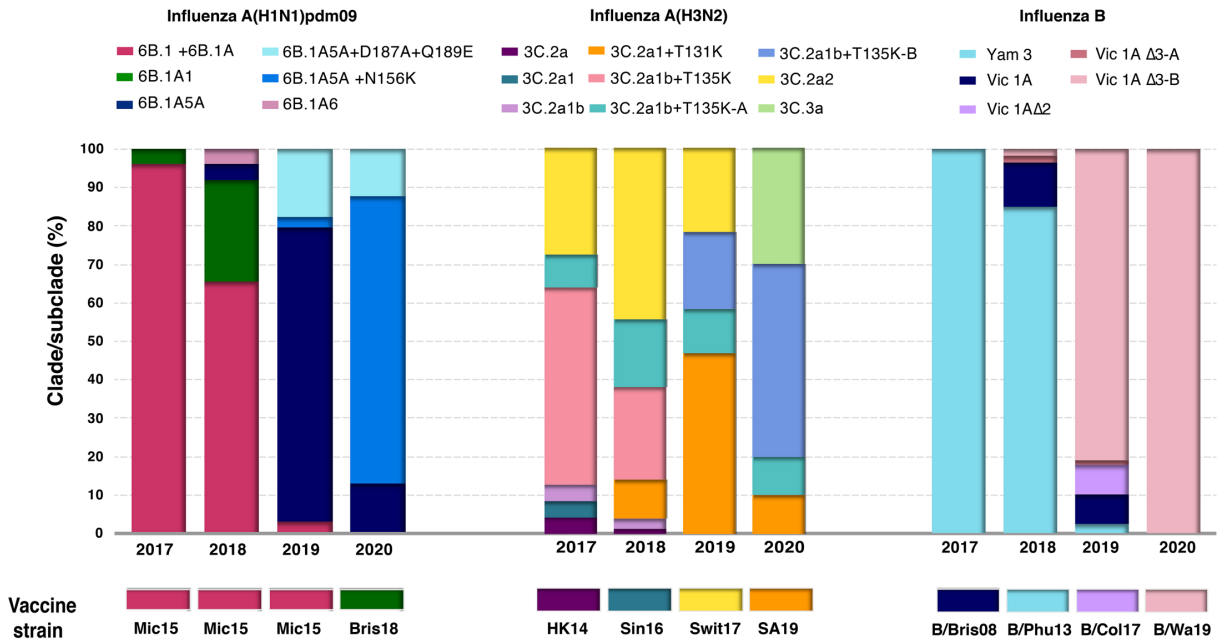

**Supplementary Figure 2.** Distribution of clades/subclades of circulating influenza viruses in Thailand and their vaccine strain. The bar graph was generated by using Microsoft Excel (Office 365).

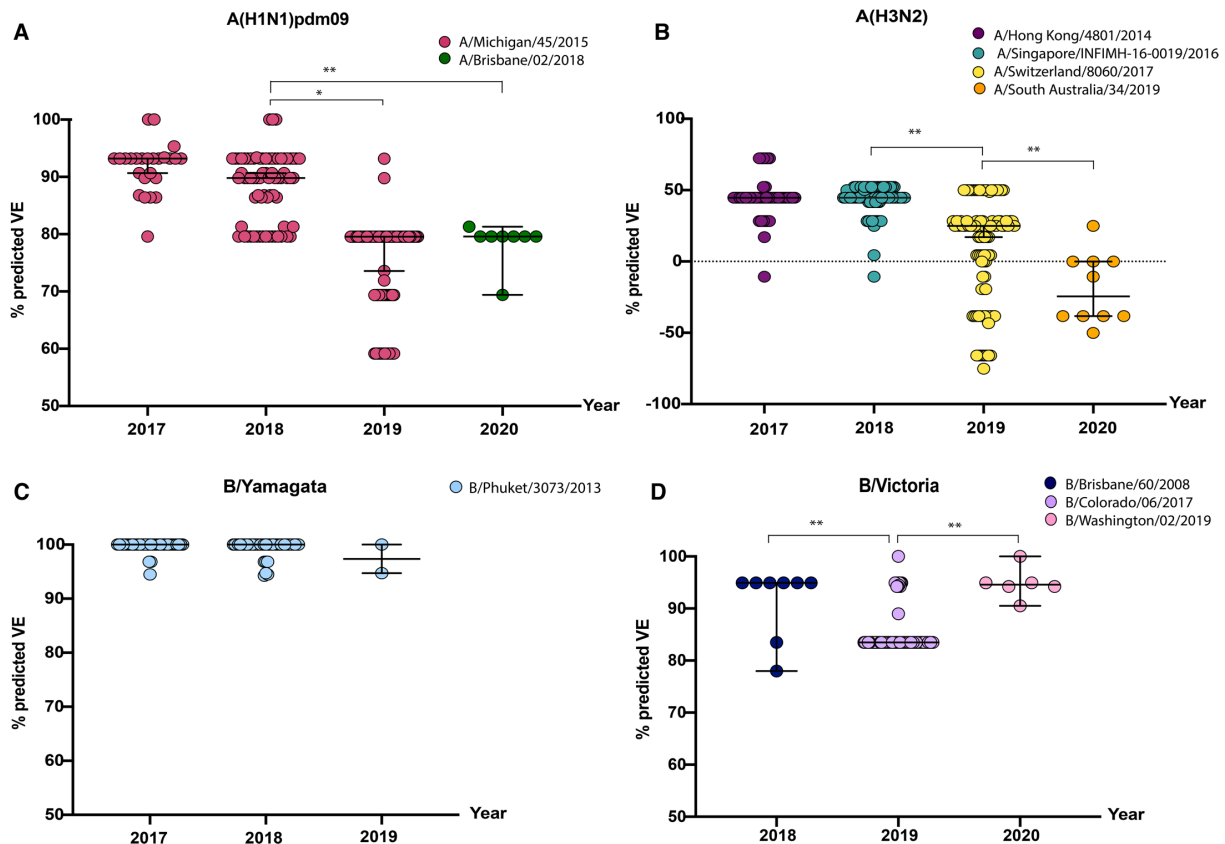

**Supplementary Figure 3.** Comparison of the yearly computed antigenic relatedness based on HA1 sequences between July 2017 and March 2020. Colored circles indicate the computed antigenic relatedness for A(H1N1)pdm09 (A), A(H3N2) (B), B/Yamagata-like lineage (C), and B/Victoria-like lineage (D) compared with their vaccine. For each year, the middle bar represents the median value with 95%CI. P-values were calculated using one-way ANOVA. \* $p < 0.01$ , \*\* $p < 0.001$ . All data were presented using GraphPad Prism version 8.0 (GraphPad, San Diego, CA; <https://www.graphpad.com>)
